# Childbearing Across Partnerships in Australia, the United States, Norway, and Sweden

Elizabeth Thomson · Trude Lappegård ·  
Marcia Carlson · Ann Evans · Edith Gray

Published online: 8 January 2014

© The Author(s) 2014. This article is published with open access at Springerlink.com

**Abstract** This article compares mothers' experience of having children with more than one partner in two liberal welfare regimes (the United States and Australia) and two social democratic regimes (Sweden and Norway). We use survey-based union and birth histories in Australia and the United States and data from national population registers in Norway and Sweden to estimate the likelihood of experiencing childbearing across partnerships at any point in the childbearing career. We find that births with new partners constitute a substantial proportion of all births in each country we study. Despite quite different arrangements for social welfare, the determinants of childbearing across partnerships are very similar. Women who had their first birth at a very young age or who are less well-educated are most likely to have children with different partners. The educational gradient in childbearing across partnerships is also consistently negative across countries, particularly in contrast to educational gradients in childbearing with the same partner. The risk of childbearing across partnerships increased dramatically in all countries from the 1980s to the 2000s, and educational differences also increased, again, in both liberal and social democratic welfare regimes.

**Keywords** Multipartnered Fertility · Repartnering · Stepfamily · Half-sibling

---

E. Thomson (✉)

Department of Sociology, Stockholm University, S106 91 Stockholm, Sweden  
e-mail: elizabeth.thomson@sociology.su.se

T. Lappegård

Statistics Norway, P.O.B 8131 Dep, 0033 Oslo, Norway

M. Carlson

Department of Sociology, University of Wisconsin–Madison, 1180 Observatory Drive, Madison, WI 53706, USA

A. Evans · E. Gray

Australian Demographic and Social Research Institute, The Australian National University, Coombs Building (#9), Canberra, ACT 0200, Australia

## Introduction

In most wealthy countries, cohabitation, divorce, nonunion or nonmarital childbearing, and repartnering have become or are becoming common features of the family system. As a result, the experience of having children with more than one partner is also on the increase. Pioneering research on childbearing across partnerships<sup>1</sup> found that a substantial component of total fertility occurred in remarriage (e.g., Bumpass 1984; Thornton 1978). In the following decades, nonmarital births, cohabitation, separation, and nonmarital repartnering generated increased attention to the phenomenon (Furstenberg and King 1998). A few recent studies provided evidence on prevalence in the United States, Australia, and Norway (Carlson and Furstenberg 2006; Gray and Evans 2008; Guzzo and Furstenberg 2007; Lappegård and Rønsen 2013; Manlove et al. 2008; Meyer et al. 2005). Only two studies (Guzzo and Furstenberg 2007; Lappegård and Rønsen 2013), however, placed the event in the context of childbearing careers where the identity of each child's other parent, as well as the child's birth order, is taken into account.

Research in the United States has shown that childbearing across partnerships was associated with socioeconomic disadvantage (Carlson and Furstenberg 2006; Guzzo and Furstenberg 2007). Such patterns are consistent with socioeconomic differences in behaviors that place parents at risk of having children with a new partner: nonunion childbearing (Ventura and Bachrach 2000) and divorce (Martin 2006) or separation (Raley and Bumpass 2003). In the context of rising levels of inequality, moreover, the degree of socioeconomic differentiation in these family behaviors may also have increased (McLanahan 2004). Socioeconomic differentiation may not be so great, however, where economic inequality is lower or where state support for children and families is greater (Härkönen and Dronkers 2006; Kennedy and Thomson 2010; Perelli-Harris et al. 2010).

In this article, we consider childbearing across partnerships as an event in a woman's childbearing career—a different type of birth from a second or higher-order birth with the same partner. We complement previous analyses of this sort for men (Guzzo and Furstenberg 2007; Lappegård and Rønsen 2013). We use data from four countries with different histories and levels of nonunion childbearing, cohabitation, and separation/divorce to identify common features of childbearing across partnerships. We focus on socioeconomic differences that may be conditioned by welfare regimes and may therefore have increased over time.

## Childbearing Across Partnerships in Life Courses and Kinship Systems

Over the past few decades, scholars have examined several components of family change that have been observed in most Western industrialized countries since the mid-twentieth century. Together, these changes are sometimes referred to as the “second demographic transition” (Lesthaeghe 1995). They include postponement of parenthood and marriage as well as rising or high levels of cohabitation, nonmarital childbearing,

<sup>1</sup> “Childbearing across partnerships” is no more felicitous a term than “multipartnered fertility” used in much of the previous research, but the latter term is a misnomer in the vast majority of cases where parents have children with no more than two different partners. Another option—“stepfamily fertility”—may be misleading because “stepfamily” has been used only with respect to coresident partnerships and often only with respect to marriage.

and divorce (Lesthaeghe 1995; Van de Kaa 1987). Although these trends have been widely documented across a host of industrialized nations, notable variation exists in the timing and intensity with which they have occurred (Amato and James 2010; Kiernan 2001; Roberts et al. 2009) as well as the extent to which they are even viewed as part of a singular transition in family systems (Council of Europe 1991).

Childbearing across partnerships arises from instability in adult unions during the childbearing years, the desire of single parents for new partners, and the new couple's desire for a child together. With an increasing pool of single parents and their propensity to form new partnerships, together with the value of shared children for new partnerships (Thomson et al. 2002), it is not surprising that childbearing across partnerships occurs and has potentially increased. It is important, however, to recognize that childbearing across partnerships is not new. With high mortality rates through the early twentieth century in most industrialized countries, it was not uncommon to experience the death of a spouse during the childrearing years, remarry, and have more children. As mortality fell, having a child with a new partner most often occurred after nonunion childbearing, separation, and divorce.

Childbearing across partnerships driven by union instability has potentially greater implications for family complexity than when one of the parents dies. Families continue to be a foundational unit in the social order of most societies, and the parent-child bond remains fundamental among kin relationships (Nock et al. 2008; Rossi and Rossi 1990). Parents are charged with socializing children to be positive and productive citizens as well as providing for their material needs, although there is notable variation across welfare states in the extent to which childrearing is supported by public institutions (Gornick and Meyers 2003).

In the recent past, children were likely to be reared in the family unit referred to as the "structurally isolated nuclear family," in which married mothers and fathers shared a residence with their biological offspring, generally living apart from extended kin (Davis 1949; Parsons 1955; Popenoe 1988). The confluence of biological relatedness, coresidence, and legal ties increased the ability of parents to spend time and money on their children and clarified their rights, obligations, and responsibilities. Rights, obligations, and responsibilities were concentrated in the nuclear family to some extent at the expense of obligations and responsibilities to extended kin (Parsons 1955).

The rise in divorce in the late twentieth century called into question the viability of the nuclear family model for organizing the care and well-being of family members. Particular attention was drawn to the ambiguities in norms, authority, legal relationships, and habits that arose when parents did not live together and when they formed stepfamilies with a new partner (Bernard 1956; Cherlin 1978; Furstenberg and Cherlin 1991; Ihinger-Tallman 1988). Although some of the association between stepfamily formation and child or family outcomes is certainly due to the characteristics of individuals who enter these statuses (Castro-Martin and Bumpass 1989; Furstenberg and Spanier 1984), it is clear that changing partners when children are involved has profound implications for the character of intrafamilial relationships and broader kinship networks (Furstenberg 1990). The birth of children in the new partnership adds considerably to that complexity (Bumpass 1984), with possible adverse effects on parents' ability to provide effective parenting and sufficient economic resources for their children.

## Prevalence and Variation in Childbearing Across Partnerships

As divorce replaced parental death as the primary family-disrupting event during the early twentieth century, remarriage became the primary source of childbearing across partnerships. Thornton (1978) found, for example, that white U.S. women who divorced and remarried had, on average, 1.59 children at the end of their first marriage and 3.30 children 17 years after first marriage. The data covered childbearing during the 1950s and 1960s, when cohabitation was unusual in the United States, so they likely captured most of the childbearing across partnerships that occurred. Bumpass (1984) showed that about 20 % of children living with their mothers in 1980 had a half-sibling from one or the other parent's remarriage. He noted that the analysis likely missed a considerable number of half-siblings born in cohabitation, not recorded in his data. Bumpass et al. (1995) showed, indeed, that a significant proportion of stepfamilies were formed by cohabitation, but they did not distinguish between stepfamilies that did and those that did not produce additional births. Recent studies that include cohabiters show that about one-half of stepfamily couples have a child together (e.g., Holland and Thomson 2011; Thomson et al. 2002; Vikat et al. 1999). In such families, at least one of the parents will then have had children with two or more partners.

A substantial minority of contemporary parents have had children with more than one partner. Carlson and Furstenberg (2006) reported that about one-quarter of respondents with a new baby in the Fragile Families and Child Wellbeing Study (based on an urban U.S. sample) reported that they had children from a previous relationship. Estimates for a more representative sample of U.S. fathers, not conditioned on a recent birth, are somewhat lower, about 17 % (Guzzo and Furstenberg 2007). Gray and Evans (2008) estimated that among Australian cohorts just above childbearing age, between 10 % and 17 % of fathers, and between 13 % and 20 % of mothers had a child with more than one partner. Their estimates vary depending on whether two children born outside marriage are assumed to have the same or different parents. Estimates from Danish register data indicate that about 10 % of fathers aged 38 or older had children with more than one mother (Sobotka 2008). Estimates from Norway show an increase in the proportion of men who had children with more than one mother, from less than 4 % of those born before World War II to about 11 % of those born in the early 1960s (Lappegård et al. 2011). Among parents with two or more children—the precondition for having a child with more than one partner—percentages who have done so are of course greater, ranging from 12 % of the two-child Australian fathers to 37 % of the two-child mothers in the U.S. Fragile Families and Child Wellbeing Study.

Differential patterns of fertility and family formation have been identified as an important aspect of growing economic inequality in the United States (Cancian and Reed 2009; McLanahan and Percheski 2008). Because the less well-educated are more likely to have nonmarital births (Perelli-Harris et al. 2010; Ventura and Bachrach 2000) and to be separated or divorced (Härkönen and Dronkers 2006; Martin 2006) than their higher-educated counterparts, and because they begin their childbearing at an earlier age (Wilde et al. 2010), their exposure to the risk of having a child with a new partner is greater. Education also appears to be negatively associated with entering a stepfamily in some contexts but not in others and differentially for men and women (Sweeney 2010). A lack of educational differentiation in stepfamily formation could result from two opposing processes: the less well-educated are more likely to be in the pool of those at

risk of forming a stepfamily but, especially in the case of men, are less attractive partners on the repartnering market. If they do repartner, the less well-educated have fewer resources with which to support a larger family. Evidence for the overall association of socioeconomic status with childbearing across partnerships is mixed but generally suggests that the college-educated are less likely to have children with more than one partner (Carlson and Furstenberg 2006; Guzzo and Furstenberg 2007). A recent study of Norwegian men found that compared with those with tertiary education, men with secondary education were *less* likely to have children with more than one partner, a difference that is consistent with the argument about partner attractiveness and resources for stepfamily childbearing. On the other hand, both education groups were less likely to experience childbearing across partnerships than men with only compulsory education (Lappegård and Rønsen 2013).

A key question in inequality research is the extent to which different welfare regimes produce different levels of inequality in terms of poverty, earnings, income, and intergenerational mobility (Breen and Jonsson 2005; Gottschalk and Smeeding 1997; Kenworthy 1999). When welfare regimes operate to reduce economic inequality overall or to direct particular support toward children and families, differences in family behavior may also be attenuated. Income transfers to the lower economic groups, especially transfers directed to parents, should lessen economic stressors that undermine relationship stability. Such transfers also reduce economic incentives for single parents to repartner. For those who do repartner, however, transfers to parents reduce the costs of children and thereby differences between the lower and higher socioeconomic groups in childbearing across partnerships. Altogether, then, we would expect associations between socioeconomic status and childbearing across partnerships to be weaker and possibly absent in countries with more generous welfare provisions, especially those that are directed toward families with children.

Evidence for such context-dependent socioeconomic gradients is limited and not completely consistent. Härkönen and Dronkers (2006) found, for example, that welfare state generosity is associated with a less-negative educational gradient in divorce. On the other hand, Perelli-Harris et al. (2010) reported a strong educational gradient in nonunion childbearing in both liberal and social democratic welfare regimes. Furthermore, they found that the educational gradient in cohabiting births—which, in turn, are associated with union instability (Andersson 2002a)—is not associated with the generosity of the welfare state.

Socioeconomic differences in family behavior do, however, appear to be increasing as income inequality rises in wealthy countries, including those with more generous welfare regimes. The Nordic countries, with their very high levels of social welfare, experienced an increase in inequality from the mid-1980s to a similar degree as the United States (OECD 2008). Of course, levels of inequality were and continued to be much lower in the Nordic countries, while the United States reached a level of inequality well above that of other liberal welfare states. Further, differential levels of inequality can be directly linked to welfare state provisions in the form of public cash transfers and household taxes (OECD 2008). The very high levels and increase in economic inequality in the United States was shown by McLanahan (2004) to be paralleled by “diverging destinies” for U.S. children, such that family instability and complexity were increasingly concentrated among those with the fewest economic resources. Her analysis of other welfare states was limited to a cross-section but found

socioeconomic differences in family stability and complexity even in countries with generous provisions for social welfare. Other research has shown that since the 1980s, educational differences in family formation and stability have increased, but the increases are not consistently associated with welfare state generosity (Härkönen and Dronkers 2006; Hoem 1997; Perelli-Harris et al. 2010). One result that does stand out, however, is the pattern first observed by McLanahan (2004) in which the United States is an outlier in terms of educational differences in family stability and complexity (Kennedy and Thomson 2010; Thomson et al. 2013).

In this article, we provide considerable additional data on childbearing across partnerships, with one goal to identify commonalities across national contexts. A second goal is to investigate potential differences in socioeconomic variation under different welfare regimes and across time. We selected countries with welfare regimes characterized by Esping-Andersen (1990) as liberal (Australia and the United States) or social democratic (Norway and Sweden). The design is intended to provide both within- and across-regime variation in socioeconomic inequality and support for children and families. Our overarching hypothesis is that socioeconomic differences in childbearing across partnerships will be most prominent in the liberal welfare states and will have increased over time in each country.

## Demographic and Welfare Contexts

The four countries we study are all among the highest-low fertility countries with total fertility rates above 1.7 children per woman in the early 2000s (OECD 2013). Only the United States, however, has maintained a total fertility rate as high as 2.1 (replacement level) (OECD 2013). The United States and Australia have lower proportions of nonmarital births compared with the two Nordic countries (OECD 2011), in large part owing to lower prevalence of cohabitation. Estimates for the 1990s indicated that only 5 % to 7 % of births in Sweden and Norway were to women living alone compared with 17 % in the United States (Andersson 2002a) and 8 % in Australia (de Vaus 2004). The United States is also an outlier in having the highest dissolution rates for both cohabitation and marriage (Andersson 2002b). As a result of these combined variations in family formation and dissolution, parents with children are much more likely to be living alone and at risk of childbearing with a different partner in the United States compared with the Nordic countries and Australia.

Norway and Sweden are both classified as social democratic countries in theoretical typologies (Arts and Gelissen 2002; Esping-Andersen 1990) with high transfers and a resulting relatively low level of economic inequality (OECD 2008). Both countries have long histories of state support for parenthood (parental leave, public child care, leave for care of sick children, and child allowances). Both represent the dual-earner model of family organization, although in this respect, Norway is somewhat less egalitarian than Sweden (Sainsbury 2001). In particular, Norway has historically provided less access and lower subsidies for public child care while generally favoring mothers, especially single mothers, in income support (Nordic Social-Statistical Committee 2004).

Australia and the United States were both established as British colonies and have quite heterogeneous populations in terms of ancestry and immigrant or colonial experience compared with the Nordic countries. Both are classified among the liberal



welfare states (Esping-Andersen 1990) with a minimal safety net and emphasis on means-tested benefits. Some scholars suggest, however, that Australia sits apart from other liberal welfare states because of its “more inclusive approach to social protection than the standard liberal form” (Arts and Gelissen 2002:146). Castles (1998) argued that Australian’s safety net is set at a higher level than would be expected of a truly liberal welfare state. Australian income redistribution does not focus on the very poor, nor does it follow a social-democratic universally focused redistribution (Castles and Mitchell 1993). Castles (2004) noted, however, that in the area of family policy and spending, Australia is very similar to the United States, with low levels of spending, lack of maternity leave schemes, and failure to provide adequate publically funded childcare. McDonald and Moyle (2010) argued that this failure to provide services has led to a decline in fertility in liberal welfare states but that fertility in the United States is propped up by high levels of unintended pregnancy, very early childbearing, and very religious subpopulations. Unintended pregnancy and early childbearing would likely produce uniquely high rates of childbearing across partnerships in the United States.

Economic inequality also varies across welfare state regimes. In the mid-1990s, the decile ratios for the top versus bottom 10 % of the income distribution were, respectively, 4.3 and 5.6 in Australia and the United States, compared with 2.8 and 2.6 in Norway and Sweden (Smeeding 2005). From the 1980s to the early 2000s, however, only Australia experienced no increase in levels of inequality (OECD 2008; Smeeding 2005).

Despite differences between countries within each pair, the two-by-two design is likely to offer more insight into the phenomenon of childbearing across partnerships than a more arbitrary set of comparative contexts. In terms of family behavior, the pool of parents at risk of repartnering is much greater in the United States than in the other three countries because of exceptionally high proportions of nonunion births and separation. Furthermore, generous provisions to parents, especially to single parents, in the Nordic welfare states reduce economic incentives to repartner in comparison with the United States and Australia. Again, the incentives may be much greater in the United States than in Australia. After repartnering, however, Nordic mothers experience lower costs of further childbearing in comparison with mothers in the United States and Australia, thus compensating to some extent for the smaller pool of parents at risk and the lower incentives to repartner.

As discussed earlier, the differential resources available to persons with different levels of education could have opposing effects on childbearing across partnerships because material resources may increase union stability but also increase possibilities for repartnering after separation. Regardless of the directional influences, however, material resources are less strongly associated with education in the social democratic welfare regimes than in the liberal welfare regimes. Thus, we expect a smaller educational gradient in childbearing across partnerships in Norway and Sweden compared with Australia and the United States. Differences in inequality between Australia and the United States, however, may also produce a difference in gradient between these two liberal welfare states. Because Australia has had relatively stable levels of economic inequality compared with the Nordic countries and the United States, educational differences in childbearing across partnerships would be expected to have shifted least in Australia, with greater change in the other three countries.

## Data and Methods

Our data come from nationally representative surveys in Australia and the United States and from population registers in Sweden and Norway. We observe birth cohorts from 1952 to 1991.

For Australia, we use data from the most recent wave (2008) of the Household, Income and Labour Dynamics in Australia (HILDA) survey, a longitudinal panel survey that began in 2001. The sampling unit is the household, selected using a multistage approach. Everyone aged 15 and older who resides in the household is interviewed in person. In Wave 1, the household response rate was 66 %, and the individual response rate was 92 %. The attrition rate for Wave 2 was 13 % and has dropped to 5 % per wave since Wave 5. The attrition rate is highest for those aged 15–24, those born in a non-English-speaking country, respondents of Aboriginal or Torres Strait Islander descent, and those who were single, unemployed, or working in low-skilled occupations (Watson 2010; Wooden and Watson 2007).

For the United States, we use data from the National Survey of Family Growth (NSFG), Cycle 7 (continuous survey) and Cycle 5 (1995), both conducted by the National Center for Health Statistics.<sup>2</sup> The 1995 survey sample was drawn from households interviewed in the 1993 National Health Interview Survey (response rate about 95 %) and selected civilian and noninstitutionalized women who were aged 15–44 on April 1, 1995. African American and Hispanic women were oversampled. The NSFG response rate was 79 % (Mosher 1998). In 2006, the NCHS inaugurated a continuous version of the NSFG, drawing household samples from primary sampling units throughout the country and selecting one respondent per household (Groves et al. 2009). Men and women aged 15–44 are eligible to be interviewed. African American, Hispanic, and teenage respondents were oversampled. The response rate was 75 % (Abma et al. 2010). By pooling data from 1995 with the 2006–2008 release of the continuous survey, we are able to cover the same female cohorts as are included in HILDA. Interviews with female respondents were carried out in person using computer-assisted personal interviews (CAPI).

Neither the U.S. nor the Australian survey included questions about the identity of each child's father (except for children living in the household at the time of interview). Fatherhood must be inferred from the dates of births, cohabitations, and marriages. HILDA contains the year and month of birth for all coresident children and nonresident children under age 24. For older nonresident children, only the age at interview is known. Year and month of all marriages are reported, but information on cohabitation is not quite complete for some respondents. Respondents report the year and month of first cohabitation, and of any cohabitation prior to a reported marriage. They also report cohabitation status at each interview and the total number of cohabitations at the last interview. Thus, a few cohabiting unions between the first cohabitation and the last interview that did not result in marriage may be missed. The NSFGs include the year and month of each birth, cohabitation, and marriage, and the year and month of the couple's separation for unions that dissolved.

We classify children as born to a particular cohabiting or marital partner if the child's birth month falls from six months before the start of a union to nine months after the

<sup>2</sup> The 2005 NSFG had an error in skip instructions that compromised the quality of union histories.



union's end, presuming that the child was conceived in that union. If the nine-month period overlaps with the six-month period before a subsequent union, we consider the child to be born in the prior union, not the next union.<sup>3</sup> We censor observations at six months before the interview date given that we cannot observe union status after the interview but within six months of a birth. We assume that every spell in a union or between unions represents a different partner when a child is born. This means that if a first birth occurs more than six months before the first union or more than nine months after a dissolved union and more than six months before a subsequent union, any second birth is classified as with a new partner.<sup>4</sup> If we did not allow for the extra six or nine months before or after a union, the percentage of women with two or more children and more than one father would be increased by less than 1 % in Australia but by about 3 % in the United States.<sup>5</sup>

For Norway and Sweden, we use data from the national population registers. Every legal resident of each country is assigned a unique person number that can be used to link such registered events as births, marriages, divorces, place of residence, immigration, and so on. For each birth in Sweden, we know the child's birth month and year and can identify the child's mother and father. Thus, birth histories can be created from the mother's and the father's points of view. In a very small proportion of cases, fathers are not identified, but an unknown father can be presumed not to be the same person as the father of an earlier- or later-born child, whether identified or not. Thus, without reference to marriage or union histories, we are able to directly determine whether a birth is with the same man as any prior births.

The much greater accuracy of our estimates for Norway and Sweden than for Australia and the United States means that we must be cautious in drawing conclusions from cross-national differences in the absolute levels of childbearing across partnerships. Differences between estimates for Australia and the United States may also arise to some extent from differences in cohabitation histories and nonresponse, but the direction of these biases is not entirely clear. We discuss these issues further in the context of presenting results.

To estimate differences in the risk of childbearing across partnerships, we apply discrete-time hazard regression. After each birth with the first child's father, women are at risk of having no additional children, having the next child with the same man, or having the next child with another man. By including the competing risk of having an  $n + 1$ st birth with the same man who fathered the first  $n$  children, we control for

<sup>3</sup> In HILDA, children aged 24 and older who are not living in the household are allocated to unions based only on the year of birth. This is most common, of course, for the older cohorts of respondents with lower proportions of nonunion births. In almost all cases, year of birth is sufficient to allocate the child to a particular union or a nonunion spell.

<sup>4</sup> A woman could, of course, have children in different union or nonunion spells but with the same father, and this might be especially likely for a first birth out of union. We checked this possibility with data from the U.S. Fragile Families and Child Wellbeing Study (Reichman et al. 2001). Among mothers having their first child at the study's initiation, not living with the child's father, and having a second child, 38 % had the second child with the same father. Because the Fragile Families and Child Wellbeing Study is based on a sample of disproportionately urban and poor mothers and covers only the younger cohorts, the percentage for mothers in HILDA or the NSFG would be considerably lower. Further, in retrospective surveys, mothers may be motivated to report union dates that encompass the births of children who are born to the same father.

<sup>5</sup> The few cohabitations that may be unreported in the Australian survey are unlikely to influence these allocations to any significant degree. The vast majority of births classified as out of union occurred before the first union (cohabitation or marriage) that is reported by every woman.

predispositions to have large numbers of children. Observations are censored after the first new-partner birth. For example, women who had two children with different fathers do not contribute to the risk of having a third child with the same or a different father. Multiple births are treated as a single event, either born to the same or a different father than previous children. We censor after a multiple birth with the same father because of the likely unique consequences of multiple births for further childbearing. Thus, if a woman's first birth is a multiple birth, she does not contribute any exposure time to the estimation. Finally, we censor at the last observation or when a woman reaches age 45, whichever occurs first. In the register data, we also censor at mother's death before age 45. Duration at risk is measured in calendar years since the previous birth (with the same father as for the first birth),<sup>6</sup> and duration dependence is specified as a quadratic function of years since the previous birth.

Socioeconomic disadvantage is represented by three indicators that are available in each data set. The mother's and maternal grandmother's highest attained education is classified as compulsory only, secondary (high school, gymnasium degree), or tertiary (college or university degree). We also include indicators for immigrant status. In the U.S. NSFG, we know only whether the woman is foreign-born or native-born. Women in HILDA were classified as born in Australia, in another English-speaking country, or in a non-English-speaking country. In Sweden and Norway, we classify immigrants into five origin groups: other Nordic countries (including Sweden for Norway, and Norway for Sweden); Western Europe, the United States, Canada, or Australia; Eastern Europe; Asia; and Central and South America. In Sweden, immigrants are women who came to Sweden before age 16; adult immigrants are not included in the analysis because we do not have union information for births of children prior to immigration.

We also control for several dimensions of the mother's birth and union history that may indicate a propensity for union stability and/or repartnering, but we are limited by information available across all four countries. Mother's age at first birth is classified as under age 20, 20–24, 25–29, and 30 and older. We include an indicator for women who were married and divorced prior to the first birth. To account for changes over time in nonunion childbearing and parental separation, we control for the historical period in which the interval began: that is, the year of the  $n$ th birth with the first father (1970s, 1980s, 1990s, 2000s). Decade is specified as a fixed covariate for each interval, representing in a rough manner period differences in the propensities to have further children, separate, and/or repartner. We also know mother's marital status at first birth in all four countries and union status (living alone, cohabiting, married) at first birth in the survey data for Australia and the United States.<sup>7</sup> We do not use this variable, however, because we also use the information in the survey data to measure childbearing with a different father. As noted earlier, when a first child is born out of union, we define the mother's second child—whether born in a union or not—as being with a different father. Thus, women with a nonunion first birth have zero risk of having the second child with the same father, and the risk of having a second child at all is identical to the risk of having a second child with a different father.

<sup>6</sup> Because they cast doubt on the quality of a woman's birth history, intervals of less than seven months were excluded, along with all subsequent intervals for a given woman. Intervals within the same calendar year were also excluded because the smallest unit of observation is a calendar year.

<sup>7</sup> Cohabitation is not registered in the Nordic countries but can be estimated with residential data for partners who have children together. Such estimates were not available in Norway for the entire period observed.

## Results

Table 1 shows for each country the percentage of women that had at least one child with a different partner than the father of their first child. In all four countries, we observe a monotonically increasing relationship between the number of children women have had and the likelihood that they have had children with more than one partner. At each parity, for all mothers, and for all two-child mothers, the United States is an outlier with the highest proportion having a child with more than one partner. Australia is more similar to the social democratic welfare regimes in the overall level of childbearing across partnerships.

Table 2 presents descriptive statistics for birth outcomes, conditional on parity in the first childbearing union. All mothers for whom the second birth interval was observed (singleton first birth, interval across different calendar years) are included in the first panel. Progression to parity 2 is very high, consistent with the fertility regimes in the four countries. The proportion of women whose second birth is with a different father is, however, much higher in the United States than in the other three countries: 27 % of second births compared with less than 15 % in the other countries. As noted earlier, the Australian and U.S. estimates could be biased upward by our assumption that second births after a first birth out of union are with a different father; but the fact that we allocated children to unions occurring within six months of their birth would have a countervailing effect. Differences between the United States and other countries are largely due to the higher proportion of first births to mothers living alone, as opposed to cohabiting or married mothers. In the NSFG sample, 17 % of first births were out of union; and by our measure, they produced 64 % of second births with a different father than the first. Corresponding estimates for the HILDA sample are 11 % and 45 %, respectively. We cannot directly observe nonunion births in the Norwegian register data for the period studied here, but for more recent periods, estimates from registers are 8 % to 12 % (Statistics Norway *n.d.*). In Sweden, register-based estimates are between 8 %

**Table 1** Percentage of women who had children with two or more fathers

|             | Australia |        | United States |        | Norway |         | Sweden |           |
|-------------|-----------|--------|---------------|--------|--------|---------|--------|-----------|
|             | %         | Number | %             | Number | %      | Number  | %      | Number    |
| Parity      |           |        |               |        |        |         |        |           |
| Two         | 11.6      | 1,017  | 25.6          | 2,987  | 13.4   | 358,699 | 10.1   | 627,027   |
| Three       | 16.3      | 530    | 35.9          | 2,159  | 24.9   | 196,008 | 23.3   | 285,996   |
| Four        | 25.5      | 161    | 49.6          | 795    | 36.2   | 49,082  | 35.9   | 75,494    |
| Five        | 35.8      | 43     | 57.4          | 248    | 41.2   | 12,917  | 41.3   | 20,282    |
| Two or More | 15.6      | 2,132  | 32.8          | 7,334  | 19.5   | 616,706 | 16.3   | 1,064,130 |
| All Mothers | 12.2      | 2,824  | 23.3          | 10,500 | 15.9   | 766,623 | 12.6   | 1,373,522 |

*Notes:* Women born in 1952–1991, children born ages 16–45, singleton first birth, second birth exposure 1+ year. U.S. estimates are weighted (see text), number unweighted.

*Sources:* Australia: HILDA (2008). United States: NSFG (1995 and 2006–2008). Sweden: registers (1968–2007). Norway: registers (1970–2007).

**Table 2** Parity progressions with same or different father

|                                                    | Birth Outcomes (%) |               |         |           |
|----------------------------------------------------|--------------------|---------------|---------|-----------|
|                                                    | Australia          | United States | Norway  | Sweden    |
| All Mothers                                        |                    |               |         |           |
| No second birth                                    | 22.7               | 28.9          | 18.9    | 22.5      |
| Second birth                                       | 77.3               | 71.1          | 81.1    | 77.5      |
| Total                                              | 100.0              | 100.0         | 100.0   | 100.0     |
| Mothers With Second Birth                          |                    |               |         |           |
| Second birth same father                           | 87.1               | 73.0          | 85.7    | 88.4      |
| Second birth different father                      | 12.9               | 27.0          | 14.3    | 11.6      |
| Total                                              | 100.0              | 100.0         | 100.0   | 100.0     |
| Number of mothers                                  | 2,824              | 10,500        | 766,623 | 1,373,522 |
| Mothers With Two Children, Same Father             |                    |               |         |           |
| No third birth                                     | 53.5               | 55.4          | 59.0    | 63.7      |
| Third birth                                        | 46.5               | 44.6          | 41.0    | 36.3      |
| Total                                              | 100.0              | 100.0         | 100.0   | 100.0     |
| Mothers With Third Birth, First Two Same Father    |                    |               |         |           |
| Third birth same father                            | 90.1               | 87.3          | 87.5    | 87.6      |
| Third birth different father                       | 9.9                | 12.7          | 12.5    | 12.4      |
| Total                                              | 100.0              | 100.0         | 100.0   | 100.0     |
| Number of mothers                                  | 1,826              | 4,757         | 525,776 | 897,282   |
| Mothers With Three Children, Same Father           |                    |               |         |           |
| No fourth birth                                    | 67.3               | 66.9          | 75.6    | 73.7      |
| Fourth birth                                       | 32.7               | 33.1          | 24.4    | 23.3      |
| Total                                              | 100.0              | 100.0         | 100.0   | 100.0     |
| Mothers With Fourth Birth, First Three Same Father |                    |               |         |           |
| Fourth birth same father                           | 93.1               | 83.5          | 88.4    | 89.1      |
| Fourth birth different father                      | 6.9                | 16.5          | 11.6    | 10.9      |
| Total                                              | 100.0              | 100.0         | 100.0   | 100.0     |
| Number of mothers                                  | 750                | 1,750         | 186,340 | 272,741   |
| Mothers With Four Children, Same Father            |                    |               |         |           |
| No fifth birth                                     | 67.6               | 63.4          | 73.5    | 69.4      |
| Fifth birth                                        | 32.4               | 36.6          | 26.5    | 30.6      |
| Total                                              | 100.0              | 100.0         | 100.0   | 100.0     |
| Mothers With Fifth Birth, First Four Same Father   |                    |               |         |           |
| Fifth birth same father                            | 91.8               | 93.4          | 92.6    | 92.6      |
| Fifth birth different father                       | 8.2                | 6.6           | 7.4     | 7.4       |
| Total                                              | 100.0              | 100.0         | 100.0   | 100.0     |
| Number of mothers                                  | 225                | 467           | 39,673  | 61,388    |

*Notes:* Women born in 1952–1991, children born ages 16–45 years, singleton first birth, birth exposures 1+ years. U.S. estimates are weighted (see text); number is unweighted.

*Sources:* Australia: HILDA (2008). United States: NSFG (1995 and 2006–2008). Sweden: registers (1968–2007). Norway: registers (1970–2007).

and 10 % for all births and somewhat higher for first births during the periods we observe (Thomson and Eriksson [forthcoming](#)).

Parallel data for mothers who had two children with the first father, whose second birth was singleton, and who could be observed in the following calendar year are presented in the second panel. After two children with the same man, Nordic mothers are less likely to have a third birth. Differences in the likelihood of a birth with a different partner, however, are not very pronounced: 10 % of third births in Australia, and a little more than 12 % in the other countries. This is further evidence that the cumulative differences across countries shown in Table 1 arise in large part from the very high proportion of second births occurring after a nonunion birth in the United States. The last two panels show that Nordic mothers are much less likely to have a fourth and fifth birth, respectively, after three and four with the same father, compared with their U.S. and Australian counterparts. At the same time, the United States is again an outlier in the proportion of fourth births with a different father. After four births with the same man, the very few fifth births are almost all with the same father, and this is true across countries.

Table 3 presents descriptive statistics for the maternal characteristics available across all four data sets that we hypothesize are associated with the propensity to have a child with more than one father. The distribution of maternal characteristics is based on the sample of mothers observed at risk of a second birth.

In the United States, first births occur disproportionately to very young mothers: nearly one-third of births occurred to teenage women, compared with 8 % to 15 % in the other countries. Consistent with their lower levels of cohabitation, Australian and U.S. women are more likely to have been previously married and divorced before their first birth. The proportion of immigrants is higher in Australia and Sweden than in the United States or Norway. As noted earlier, in order to ensure complete union and birth histories, the Swedish data exclude women who migrated as adults.

Educational distributions across countries reflect both differences in the educational systems and differences in the relationship between education and childlessness or delayed childbearing, given that our analyses are based on mothers. The same can be said for the education of children's maternal grandmothers, who completed their education under quite different systems in the four countries. Women in Norway and Sweden whose mother's education is unknown are predominantly immigrants whose mothers never lived in the country.

At the bottom of Table 3 are descriptive characteristics for the birth intervals observed: that is, the second birth interval and subsequent intervals after the birth of two, three, or four children with the same father. About one-half the intervals are observed after the first birth, and another one-third or so are observed after the second birth with the same father. A greater proportion of intervals are second intervals among U.S. mothers, simply because a higher proportion of mothers had a second birth with a new father and were not observed after that birth. Variation in the distribution of the decade in which birth intervals begin does not vary much across countries, reflecting their common highest-low fertility regime over the decades observed.

Table 4 presents estimates from the discrete-time hazard model for the competing risks of having a birth with the same or a different father. Entries are the relative risk ratios for categories of maternal or interval characteristics compared with the baseline category. Because the huge number of observations in Norway and Sweden enable us

**Table 3** Characteristics of mothers and birth intervals

|                                         | Australia      | United States  | Norway    | Sweden    |
|-----------------------------------------|----------------|----------------|-----------|-----------|
| <b>Mother's Age First Birth</b>         |                |                |           |           |
| <20 years                               | 14.6           | 32.0           | 11.7      | 8.3       |
| 20–25 years                             | 31.1           | 41.0           | 45.8      | 41.7      |
| 26–29 years                             | 31.6           | 15.8           | 25.0      | 27.2      |
| 30 years or older                       | 22.7           | 11.1           | 17.4      | 22.8      |
| <b>Prior Marriage</b>                   |                |                |           |           |
| No                                      | 88.6           | 95.2           | 98.7      | 98.3      |
| Yes                                     | 9.9            | 4.8            | 1.3       | 1.7       |
| Unknown                                 | 1.5            | 0.0            | 0.0       | 0.0       |
| <b>Immigrant</b>                        |                |                |           |           |
| Native-born                             | 79.3           | 84.9           | 84.7      | 78.9      |
| Group 1                                 | 8.3            | 15.1           | 2.7       | 4.6       |
| Group 2                                 | 12.4           | — <sup>a</sup> | 2.5       | 1.6       |
| Group 3                                 | — <sup>a</sup> | — <sup>a</sup> | 10.1      | 14.8      |
| Unknown                                 | 0.0            | 0.0            | 0.0       | 0.1       |
| <b>Mother's Education</b>               |                |                |           |           |
| Compulsory                              | 28.9           | 17.8           | 9.0       | 11.9      |
| Secondary                               | 35.7           | 61.0           | 53.2      | 63.0      |
| Tertiary                                | 35.5           | 21.1           | 31.9      | 22.8      |
| Unknown                                 | 0.0            | 0.0            | 6.0       | 2.3       |
| <b>Maternal Grandmother's Education</b> |                |                |           |           |
| Compulsory                              | 47.6           | 25.7           | 40.8      | 36.4      |
| Secondary                               | 11.5           | 59.2           | 36.4      | 38.3      |
| Tertiary                                | 30.8           | 11.5           | 7.0       | 7.3       |
| Unknown                                 | 10.2           | 3.6            | 15.7      | 18.0      |
| <b>Parity With First Child's Father</b> |                |                |           |           |
| One                                     | 49.0           | 57.9           | 50.1      | 52.7      |
| Two                                     | 33.0           | 28.7           | 34.3      | 34.4      |
| Three                                   | 13.8           | 10.5           | 12.2      | 10.5      |
| Four                                    | 4.3            | 2.8            | 3.4       | 2.4       |
| <b>Decade Interval Start</b>            |                |                |           |           |
| <1980                                   | 8.8            | 13.9           | 11.4      | 10.0      |
| 1980s                                   | 28.1           | 31.7           | 29.4      | 30.2      |
| 1990s                                   | 35.9           | 34.9           | 38.9      | 36.7      |
| 2000+                                   | 27.3           | 19.6           | 20.3      | 23.1      |
| Number of Mothers                       | 2,824          | 10,500         | 766,623   | 1,373,522 |
| Number of Intervals                     | 5,625          | 17,474         | 1,531,243 | 2,605,771 |

*Notes:* Women born in 1952–1991, children born ages 16–45, singleton first birth, birth interval exposures 1+ years. U.S. estimates are weighted (see text); number is unweighted. Immigrant groups: Australia: 1 English-speaking countries, 2 non-English-speaking countries; United States: 1 all immigrants. Norway/Sweden: 1 Nordic countries, 2 Western Europe, United States, Canada, Australia, New Zealand, 3 all other countries.

*Sources:* Australia: HILDA (2008). United States: NSFG (1995 and 2006–2008). Sweden: registers (1968–2007). Norway: registers (1970–2007).

<sup>a</sup> Not applicable.



**Table 4** Relative risks of childbearing within and across partnerships

|                                         | Relative Risk Ratio, Birth With Same, Different Father vs. No Birth |                |                |                |                |                |                |                |
|-----------------------------------------|---------------------------------------------------------------------|----------------|----------------|----------------|----------------|----------------|----------------|----------------|
|                                         | Australia                                                           |                | United States  |                | Norway         |                | Sweden         |                |
|                                         | Same                                                                | Different      | Same           | Different      | Same           | Different      | Same           | Different      |
| <b>Parity (first child's father)</b>    |                                                                     |                |                |                |                |                |                |                |
| One child                               | 1.00                                                                | 1.00           | 1.00           | 1.00           | 1.00           | 1.00           | 1.00           | 1.00           |
| Two children                            | 0.37*                                                               | 0.21*          | 0.61*          | 0.23*          | 0.33*          | 0.18*          | 0.26*          | 0.19*          |
| Three children                          | 0.24*                                                               | 0.06*          | 0.43*          | 0.14*          | 0.18*          | 0.07*          | 0.18*          | 0.09*          |
| Four children                           | 0.23*                                                               | 0.06*          | 0.48*          | 0.09*          | 0.22*          | 0.05*          | 0.23*          | 0.07*          |
| <b>Mother's Age First Birth</b>         |                                                                     |                |                |                |                |                |                |                |
| <20 years                               | 1.00                                                                | 1.00           | 1.00           | 1.00           | 1.00           | 1.00           | 1.00           | 1.00           |
| 20–25 years                             | 1.18*                                                               | 0.53*          | 1.23*          | 0.46*          | 1.17*          | 0.48*          | 1.08*          | 0.49*          |
| 26–29 years                             | 1.10                                                                | 0.14*          | 1.25*          | 0.14*          | 1.20*          | 0.17*          | 1.05*          | 0.17*          |
| 30 years or older                       | 0.84*                                                               | 0.08*          | 1.00           | 0.06*          | 0.93*          | 0.07*          | 0.82*          | 0.07*          |
| <b>Prior Marriage</b>                   |                                                                     |                |                |                |                |                |                |                |
| No                                      | 1.00                                                                | 1.00           | 1.00           | 1.00           | 1.00           | 1.00           | 1.00           | 1.00           |
| Yes                                     | 1.06                                                                | 1.22           | 0.79*          | 0.92           | 0.70*          | 1.36*          | 0.78*          | 1.53*          |
| Unknown                                 | 0.89                                                                | 1.59           | — <sup>a</sup> | — <sup>a</sup> | — <sup>a</sup> | — <sup>a</sup> | — <sup>a</sup> | — <sup>a</sup> |
| <b>Immigrant</b>                        |                                                                     |                |                |                |                |                |                |                |
| Native-born                             | 1.00                                                                | 1.00           | 1.00           | 1.00           | 1.00           | 1.00           | 1.00           | 1.00           |
| Group 1                                 | 0.88                                                                | 0.78           | 1.31*          | 0.66*          | 1.00           | 1.34*          | 0.77*          | 0.96*          |
| Group 2                                 | 0.74*                                                               | 0.39*          | — <sup>a</sup> | — <sup>a</sup> | 1.15*          | 1.06           | 0.93*          | 0.86*          |
| Group 3                                 | — <sup>a</sup>                                                      | — <sup>a</sup> | — <sup>a</sup> | — <sup>a</sup> | 1.24*          | 0.78*          | 1.06*          | 0.90*          |
| Unknown                                 | — <sup>a</sup>                                                      | — <sup>a</sup> | — <sup>a</sup> | — <sup>a</sup> | 1.29*          | 0.18           | 1.26*          | 1.28*          |
| <b>Mother's Education</b>               |                                                                     |                |                |                |                |                |                |                |
| Compulsory                              | 1.00                                                                | 1.00           | 1.00           | 1.00           | 1.00           | 1.00           | 1.00           | 1.00           |
| Secondary                               | 0.96                                                                | 0.99           | 0.78*          | 0.63*          | 0.96           | 0.85*          | 0.96*          | 0.83*          |
| Tertiary                                | 1.10                                                                | 0.70*          | 0.96           | 0.44*          | 1.18*          | 0.76*          | 1.12*          | 0.75*          |
| Unknown                                 | — <sup>a</sup>                                                      | — <sup>a</sup> | — <sup>a</sup> | — <sup>a</sup> | 0.94*          | 0.63*          | 0.76*          | 0.44*          |
| <b>Maternal Grandmother's Education</b> |                                                                     |                |                |                |                |                |                |                |
| Compulsory                              | 1.00                                                                | 1.00           | 1.00           | 1.00           | 1.00           | 1.00           | 1.00           | 1.00           |
| Secondary                               | 0.94                                                                | 1.14           | 0.93           | 0.98           | 1.12*          | 1.00*          | 1.05*          | 1.22*          |
| Tertiary                                | 1.01                                                                | 1.10           | 0.92           | 1.08           | 1.26*          | 1.12*          | 1.22*          | 1.29*          |
| Unknown                                 | 1.04                                                                | 1.52*          | 0.98           | 1.25*          | 1.12*          | 0.85*          | 0.99           | 0.93*          |
| <b>Decade Interval Start</b>            |                                                                     |                |                |                |                |                |                |                |
| <1980                                   | 1.00                                                                | 1.00           | 1.00           | 1.00           | 1.00           | 1.00           | 1.00           | 1.00           |
| 1980s                                   | 0.92                                                                | 1.15           | 0.81*          | 1.29*          | 0.94           | 1.59*          | 1.23*          | 1.33*          |
| 1990s                                   | 0.75*                                                               | 1.74*          | 0.72*          | 1.53*          | 0.81*          | 3.17*          | 1.01           | 1.38*          |
| 2000+                                   | 0.65*                                                               | 2.04*          | 0.66*          | 1.53*          | 0.97           | 3.61*          | 1.08*          | 1.57*          |
| Log-Likelihood                          | −10,304.5                                                           |                | −34,400.9      |                | −298,119.4     |                | −4,723,345.5   |                |

**Table 4** (continued)

|                      | Relative Risk Ratio, Birth With Same, Different Father vs. No Birth |           |               |           |            |           |            |           |
|----------------------|---------------------------------------------------------------------|-----------|---------------|-----------|------------|-----------|------------|-----------|
|                      | Australia                                                           |           | United States |           | Norway     |           | Sweden     |           |
|                      | Same                                                                | Different | Same          | Different | Same       | Different | Same       | Different |
| <i>df</i>            | 40                                                                  |           | 36            |           | 44         |           | 44         |           |
| Observations (years) | 31,176                                                              |           | 92,479        |           | 11,621,623 |           | 16,942,575 |           |

*Notes:* Women born in 1952–1991, children born ages 16–45, singleton first birth, birth interval exposures 1+ years. All estimates are unweighted (see text). Immigrant groups 1–3 are as follows: for Australia, 1 = English-speaking countries; 2 = non-English-speaking countries. For the United States, 1 = all immigrants. For Norway/Sweden, 1 = Nordic countries; 2 = Western Europe, United States, Canada, Australia, New Zealand; and 3 = all other countries.

*Sources:* Australia: HILDA (2008). United States: NSFG (1995 and 2006–2008). Sweden: registers (1968–2007). Norway: registers (1970–2007).

<sup>a</sup> Not applicable.

\* $p < .05$  for Australia and the United States; \* $p < .001$  for Norway and Sweden

to detect very small differences but the survey samples in Australia and United States do not, we use a significance level of .05 for the latter samples and .001 for the Norwegian and Swedish populations to identify differences of substantive interest.

The demographic underpinnings of childbearing with the same partner and with a new partner are generally parallel across countries.<sup>8</sup> First, the risk of having additional births declines significantly after the first two children with one father. In other words, the more births one has with the first father, the less likely one will go on to have a subsequent birth of any kind. But the decline is steeper for births with a different father than for those with the same father, suggesting that having more children in the same union particularly diminishes the chances of having a child in a new union. The risk of having another birth with the same partner is higher for women whose first birth is in their 20s compared with women whose first birth is before age 20. By contrast, the risk of having a subsequent birth with a different partner shows a striking decline with mother's older age at first birth. This is partly a function of the shorter time available to find a new partner and have more children after a first childbearing union ends. However, older first-time mothers also have more-stable unions and would therefore have less exposure to the possibility of childbearing with a new partner. These patterns are quite consistent across countries.

Another indicator of union instability—marriage and divorce prior to first birth—is also associated with a higher risk of childbearing with a different partner in Norway and Sweden but not in the United States and Australia. In the Nordic countries where marriage is least common, especially before childbearing, those who have been married and divorced before their first birth are also less likely to have a higher-order birth with the same father as their first; the same is true in the United States.

<sup>8</sup> We cannot pool the data for interaction tests because the Swedish and Norwegian register data cannot be distributed outside secure computing environments.

Childbearing across partnerships appears to be less likely among immigrants than among the native-born, with the exception of Nordic and western immigrants to Norway (many of whom are Swedes). Immigrant women from poorer countries have higher propensities to have additional children with the same father, except in Australia, where immigrants from non-English-speaking countries were more select. They must have been able to be interviewed in English and were therefore more likely to have been admitted on work than family visas.

Turning to socioeconomic differences, we also find a common pattern across countries. Mother's education is inversely associated with the risk of a birth with a different father than that of prior children. Because the educational systems differ across countries, and because the distribution across groups varies considerably, one cannot readily interpret the size of differences between educational groups. We note, however, that in Norway and Sweden, tertiary education is *positively* associated with higher-order births with the same father, creating a strong contrast with the negative gradient for births with a different partner. In Australia, the only educational difference found was a lower risk of childbearing with a different father among women with tertiary education. Net of the mother's education, maternal grandmother's education is not associated with a further decrease in childbearing with a different partner; in the Nordic countries, the net association is in fact positive. The relationships are not the result of multicollinearity because these differences are also observed without controls for mother's education.

Change across decades may also be viewed as a result of union instability given that nonunion births and parental separation increased in all four countries over the periods observed. Consistent with those trends, we find a clear increase from the 1970s onward for childbearing with different fathers. As noted earlier, the coefficients represent differences in the risk of childbearing in intervals that began in a given decade.

Finally, we consider the potential interaction between mother's education and decade: have educational differences in childbearing across partnerships increased, as has been the case for parental separation (Hoem 1997; Raley and Bumpass 2003; Kennedy and Thomson 2010)? In each country, the interaction between the woman's education and decade of interval start increased model fit. Figure 1 illustrates the nature of the interactions. At the left side of each figure are educational differences in the risk of having another child with the same father, after births that occurred in the 1970s, 1980s, 1990s, and 2000s; at the right side are corresponding differences for the risk of having another child with a different father. In each case, the baseline categories comprise women with compulsory education giving birth in the 1970s.

In Australia, Norway, and Sweden, a positive educational gradient in births with the same partner has emerged. In the United States, a U-shaped relationship does not change a great deal across time; mothers with secondary education are less likely than those with only compulsory education and less likely than those with tertiary education to have another child with the same father. In all countries, however, education is *negatively* associated with childbearing across partnerships, and the differentials increased from the 1970s to the 2000s. Thus, we find no clear evidence that welfare state regime or absolute level of inequality generates the "diverging destinies" in these four countries.

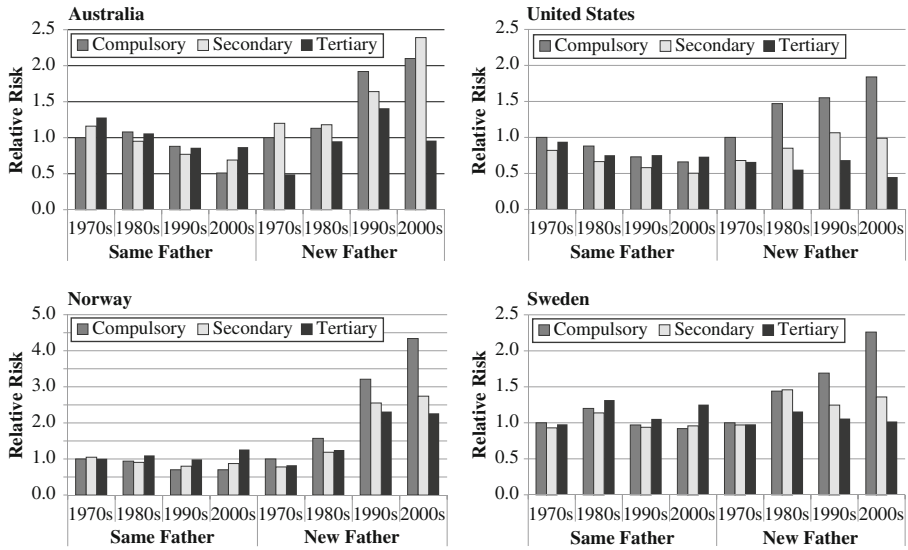

**Fig. 1** Educational differences in childbearing over time: Australia, United States, Norway, and Sweden

## Discussion

Childbearing across partnerships constitutes a unique event in the fertility career. Although distinguishing births not only by their order and timing but also by their parentage complicates fertility analysis, it also gives a more complete picture of childbearing in the family contexts that today characterize many wealthy societies. By contrasting the risk of parity progressions with the same or a different partner, one can identify the common and contrasting antecedents of each type of birth.

First, we showed that births with different partners constitute a substantial proportion of all births to women in each of the countries we study. On the other hand, in all four countries, women were highly likely to have a second birth in the same union as the first if the first child is born in a union. They also had very low progression probabilities to third births, whether in the same or a new union. Thus, births with a different father will not likely become a majority experience for mothers or for children. They will, however, likely constitute a large proportion—perhaps a majority of third and higher-order births. Childbearing across partnerships will also be much higher in contexts such as the United States where a high proportion of first births occur to women living alone and where union instability is exceptionally high (Cherlin 2009).

What seems most striking about the characteristics associated with childbearing across partnerships is how similar they were across countries with quite different arrangements for social welfare. Much of the similarity, of course, arises from what we might call “fertility fundamentals.” Parity in the first childbearing union dramatically reduced further childbearing, whether with the same or a different partner. Despite the potential added value of births in stepfamilies (Thomson et al. 2002), the overall risk of a birth with a new partner was much lower when a mother already has two or more children with the first father. That is, the lower likelihood of such women forming a new partnership, more than counterbalanced any positive effects on childbearing of the new unions that were formed (Thomson et al. 2012).

Another common pattern is that women having their first birth at a very young age were most likely to have children with different partners. Such early births were highly likely to occur out of union. The second birth usually followed a separation from the first birth father and the formation of a new partnership, again at a relatively young age. Women whose first births occurred at age 30 or older were somewhat less likely to have subsequent births but were especially unlikely to have them with a different partner. Older age at first birth was associated with greater union stability; when such unions do dissolve, older mothers had less time and perhaps less inclination to find a new partner and have additional children (Thomson et al. 2012).

Having married and divorced prior to a first birth was associated with a lower likelihood of childbearing with the same father, except in Australia, and a higher likelihood of childbearing with a different father in the Nordic countries. Because cohabitation is so much more common in the Nordic countries, with around one-half of first births born to cohabiting couples (Andersson 2002a), only select groups of women will have married and divorced before having a first child. The fact that they marry at all might suggest a greater propensity for stable unions (Andersson 2002b), but divorcing before having a child could indicate a propensity for multiple partnerships and an increased likelihood of childbearing with more than one partner. In Australia and the United States, marriage may be taken more lightly (Cherlin 2009), so a prior childless marriage is not as good an indicator of future union instability and childbearing in more than one union.

We did not find, as hypothesized, that socioeconomic differences in childbearing across partnerships would be less pronounced or absent in social democratic welfare states. Differences in the gradient for a same-partner or different-partner birth were most pronounced in the Nordic countries where the gradient was positive for same-partner births.

In the Nordic countries, the maternal grandmother's education was positively associated with both types of births: those with the same father and those with a different father. These differences could be due to grandparental resources that would support the births of additional grandchildren, whether in the same or a new partnership. Furthermore, higher divorce risks have been documented in Norway and Sweden for persons with highly educated parents (Hoem and Hoem 1992; Lyngstad 2006) and are not attributable to the stability of the parents' union, economic resources, or urban environment (Lyngstad 2006). In Sweden, the association has been attributed to an unspecified component of "bourgeois culture," including more liberal views of divorce (Hoem and Hoem 1992). In addition, the maternal grandmothers in our analyses are from cohorts in which the first increases in cohabitation and union dissolution were observed. It may have been the most highly educated who led the way toward new family forms and whose experience serves as a model for their daughters, despite the stability-enhancing effect of the daughters' own education.

Finally, we found in all four countries that educational differences in childbearing across partnerships increased from the 1970s to the 2000s. Although economic inequality is lower in social democratic than in liberal welfare states, the United States and the Nordic countries have experienced increases in inequality that may underlie these increasing differences. On the other hand, similar increases in educational differences were found in Australia, where inequality has been moderate and relatively stable. We therefore offer an additional set of cases to support McLanahan's

(2004) claim of “diverging destinies” for children of less well-educated and better-educated parents, regardless of welfare regime.

Cross-national comparisons are of value not only for identifying the scope conditions for individual-level relationships but also for demonstrating the absence of contextual effects. The differences we found were overshadowed by similarities. This tells us that childbearing across partnerships is driven more by the somewhat similar family systems and fertility patterns of the four countries than by their welfare regimes, even while public policies are shown to influence fertility patterns (e.g., Andersson 2008). Whether the same results would hold in countries with very different family systems and fertility patterns remains to be seen.

Although there are advantages to the fertility-centered approach we use here, the processes through which women come to have children with more than one partner are obscured. From previous research, we know quite a bit about the precursors to childbearing across partnerships: births out of union, parental separation, repartnering, and stepfamily childbearing. Virtually all this research is, however, limited to one or two steps in the process. By focusing on the cumulative result, we draw attention to the utility of combining analyses of union and fertility events through the childrearing years so as to explicate and understand the sources of heterogeneity in the family life course (Thomson et al. 2012).

The fertility-centered approach is also an important backdrop to the family dimensions of childbearing across partnerships. When a parent has children with more than one partner, her older children acquire a half-sibling, and the new child is born into a half-sibship. Half-siblings may contribute to solidarity in a new family but also compete for resources, especially those provided by the older children’s stepparent. The processes through which half-siblings are produced set the demographic parameters of the half-sibling relationship and possible consequences for both older and younger half-siblings (Turunen 2013). For example, the amount of time it takes for separation, repartnering, and childbearing with a new partner means that half-siblings are, on average, further apart in age than full siblings. Half-siblings on the mother’s side are likely to live together, while those produced by fathers will usually meet less frequently, if at all. As we focus on the fertility and partner parameters, we must not lose sight of their implications for the daily lives of families.

Indeed, in the same way that questions were raised in the late twentieth century about the nature and implications of stepfamilies (Cherlin and Furstenberg 1994; Hanson et al. 1996), childbearing across partnerships represents a broader phenomenon of complex family ties that emerge when childbearing occurs amidst even greater union instability. Childbearing today is likely to occur within cohabiting unions, which are typically less stable than marital unions, and at least in the United States, a nontrivial fraction of births occur outside any coresidential union. To the extent that childrearing becomes more difficult or complicated in the context of childbearing across partnerships, children in such families will be disadvantaged. Given that the least well-off are the most likely to have children with more than one partner across all four countries we examined and given that these differences have increased over time, childbearing across partnerships may be an important aspect of growing inequality and may suggest the need for new policy supports and interventions.



**Acknowledgements** This research was supported by the Swedish Research Council (Vetenskapsrådet) via the Swedish Initiative for Research on Microdata in the Social and Medical Sciences (SIMSAM): Register-based Research in Nordic Demography (839-2008-7495) and the Linnaeus Center for Social Policy and Family Dynamics in Europe (349-2007-8701); the Research Council of Norway (202442/S20); the Eunice Kennedy Shriver National Institute of Child Health and Human Development (R01HD57894); the Australian Research Council Discovery Project Scheme (DP0772544); and our respective institutions. The Household, Income and Labour Dynamics in Australia (HILDA) Survey was initiated and is funded by the Australian Government Department of Families, Housing, Community Services and Indigenous Affairs (FaHCSIA) and is managed by the Melbourne Institute of Applied Economic and Social Research (Melbourne Institute). We used an extract from the 2006–2008 National Survey of Family Growth prepared by Kelly Musick, Cornell University, for the Network on Nonmarital Childbearing, Max Planck Institute for Demographic Research, and Southampton University. The collection of register data known as Sweden in Time—Activities and Relations (STAR) is supported by several grants from the Swedish Research Council. We are grateful for research assistance from Anna Reimondos and Jani Turunen; and for valuable comments from anonymous referees and participants at the 2011 annual meeting of the Population Association of America. The findings and views reported in this article are those of the authors alone and should not be attributed to any of the sponsoring organizations.

**Open Access** This article is distributed under the terms of the Creative Commons Attribution License which permits any use, distribution, and reproduction in any medium, provided the original author(s) and the source are credited.

## References

- Abma, J. C., Martinez, G. M., & Copen, C. E. (2010). *Teenagers in the United States: Sexual activity, contraceptive use, and childbearing, National Survey of Family Growth 2006–2008* (Vital Health Statistics 23(30)). Hyattsville, MD: National Center for Health Statistics.
- Amato, P. R., & James, S. (2010). Divorce in Europe and the United States: Commonalities and differences across nations. *Family Science*, 1, 2–13.
- Andersson, G. (2002a). Children's experience of family disruption and family formation: Evidence from 16 FFS countries. *Demographic Research*, 7(article 7), 343–364. doi:10.4054/DemRes.2002.7.7
- Andersson, G. (2002b). Dissolution of unions in Europe: A comparative overview. *Zeitschrift für Bevölkerungswissenschaft*, 27, 493–504.
- Andersson, G. (2008). A review of policies and practices related to the “highest-low” fertility of Sweden. *Vienna Yearbook of Population Research*, 6, 89–102.
- Arts, W., & Gelissen, J. (2002). Three worlds of welfare capitalism or more? A state-of-the-art report. *Journal of European Social Policy*, 12, 137–158.
- Bernard, J. (1956). *Remarriage: A study of marriage*. New York, NY: Russell and Russell.
- Breen, R., & Jonsson, J. O. (2005). Inequality of opportunity in comparative perspective: Recent research on educational attainment and social mobility. *Annual Review of Sociology*, 31, 223–243.
- Bumpass, L. L. (1984). Demographic aspects of children's second-family experience. *American Journal of Sociology*, 90, 608–623.
- Bumpass, L. L., Sweet, J. A., & Raley, R. K. (1995). The changing character of stepfamilies: Implications of cohabitation and nonmarital childbearing. *Demography*, 32, 425–436.
- Cancian, M., & Reed, D. (2009). Family structure, childbearing, and parental employment: Implications for the level and trend in poverty. In M. Cancian & S. Danziger (Eds.), *Changing poverty, changing policies* (pp. 92–121). New York: Russell Sage Foundation.
- Carlson, M. J., & Furstenberg, F. F. (2006). The prevalence and correlates of multipartnered fertility among urban U.S. parents. *Journal of Marriage and Family*, 68, 718–732.
- Castles, F. (1998). *Comparative public policy: Patterns of post-war transformation*. Cheltenham, UK: Edward Elgar.
- Castles, F. (2004). *The future of the welfare state: Crisis myths and crisis realities*. Oxford, UK: Oxford University Press.
- Castles, F., & Mitchell, D. (1993). Worlds of welfare and families of nations. In F. G. Castles (Ed.), *Families of nations: Patterns of public policy in Western democracies* (pp. 93–128). Aldershot, UK: Dartmouth Publishing Company.
- Castro-Martin, T., & Bumpass, L. L. (1989). Recent trends in marital disruption. *Demography*, 26, 37–51.

- Cherlin, A. (1978). Remarriage as an incomplete institution. *American Journal of Sociology*, 84, 634–650.
- Cherlin, A. J. (2009). *The marriage-go-round: The state of marriage and the family in America today*. New York, NY: Random House.
- Cherlin, A. J., & Furstenberg, F. F., Jr. (1994). Stepfamilies in the United States: A reconsideration. *Annual Review of Sociology*, 20, 359–381.
- Council of Europe. (1991). *The second demographic transition: Fact or fiction?* (Population Studies No. 23). Strasbourg, France: Council of Europe.
- Davis, K. (1949). *Human society*. New York, NY: The MacMillan Company.
- de Vaus, D. (2004). *Diversity and change in Australian families. Statistical profiles*. Melbourne: Australian Institute of Family Studies.
- Esping-Andersen, G. (1990). *The three worlds of capitalism*. Princeton, NJ: Princeton University Press.
- Furstenberg, F. F., Jr. (1990). Divorce and the American family. *Annual Review of Sociology*, 16, 379–403.
- Furstenberg, F. F., Jr., & Cherlin, A. (1991). *Divided families: What happens to children when parents part*. Cambridge, MA: Harvard University Press.
- Furstenberg, F. F., Jr., & King, R. B. (1998, April). *Multipartnered fertility sequences: Documenting an alternative family form*. Paper presented at the annual meetings of the Population Association of America, Chicago, IL.
- Furstenberg, F. F., Jr., & Spanier, G. B. (1984). The risk of dissolution in remarriage: An examination of Cherlin's hypothesis of incomplete institutionalization. *Family Relations*, 33, 433–441.
- Gornick, J. C., & Meyers, M. K. (2003). *Families that work: Policies for reconciling parenthood and employment*. New York, NY: Russell Sage Foundation.
- Gottschalk, P., & Smeeding, T. (1997). Cross-national comparisons of earnings and income inequality. *Journal of Economic Literature*, 35, 633–687.
- Gray, E., & Evans, A. (2008). The limitations of understanding multi-partner fertility in Australia. *People and Place*, 16(4), 1–8.
- Groves, R. M., Mosher, W. D., Lepkowski, J., & Kirgis, N. G. (2009). *Planning and development of the continuous National Survey of Family Growth* (Vital Health Statistics 1(48)). Hyattsville, MD: National Center for Health Statistics.
- Guzzo, K. B., & Furstenberg, F. F., Jr. (2007). Multipartnered fertility among American men. *Demography*, 44, 583–601.
- Hanson, T. L., McLanahan, S. S., & Thomson, E. (1996). Double jeopardy: Parental conflict and stepfamily outcomes for children. *Journal of Marriage and the Family*, 58, 141–154.
- Härkönen, J., & Dronkers, J. (2006). Stability and change in the educational gradient of divorce. A comparison of seventeen countries. *European Sociological Review*, 22, 501–517.
- Hoem, J. M. (1997). Educational gradients in divorce risks in Sweden in recent decades. *Population Studies*, 51, 19–27.
- Hoem, J. M., & Hoem, B. (1992). The disruption of marital and nonmarital unions in Sweden. In J. Trussell, R. Hankinson, & J. Tilton (Eds.), *Demographic applications of event-history analysis* (pp. 61–93). Oxford, UK: Oxford University Press.
- Holland, J. A., & Thomson, E. (2011). Stepfamily childbearing in Sweden: Quantum and tempo effects, 1950–99. *Population Studies*, 65, 115–128.
- Ihinger-Tallman, M. (1988). Research on stepfamilies. *Annual Review of Sociology*, 14, 25–48.
- Kennedy, S., & Thomson, E. (2010). Children's experiences of family disruption in Sweden: Differentials by parent education over three decades. *Demographic Research*, 23(article 17), 479–508. doi:10.4054/DemRes.2010.23.17
- Kenworthy, L. (1999). Do social-welfare policies reduce poverty? A cross-national assessment. *Social Forces*, 77, 1119–1139.
- Kiernan, K. (2001). The rise of cohabitation and childbearing outside marriage in Western Europe. *International Journal of Law, Policy, and the Family*, 15, 1–21.
- Lappégård, T., & Rønsen, M. (2013). Socioeconomic differentials in multipartner fertility among Norwegian fathers. *Demography*, 50, 1135–1153.
- Lappégård, T., Rønsen, M., & Skrede, K. (2011). Fatherhood and fertility. *Fathering*, 9, 103–120.
- Lesthaeghe, R. (1995). The second demographic transition in Western countries: An interpretation. In K. O. Mason & A.-M. Jensen (Eds.), *Gender and family change in industrialized countries* (pp. 17–62). Oxford, UK: Clarendon Press.
- Lyngstad, T. H. (2006). Why do couples with highly educated parents have higher divorce rates? *European Sociological Review*, 22, 49–55.
- Manlove, J., Logan, C., Ikramullah, E., & Holcombe, E. (2008). Factors associated with multiple-partner fertility among fathers. *Journal of Marriage and Family*, 70, 536–548.

- Martin, S. P. (2006). Trends in marital dissolution by women's education in the United States. *Demographic Research*, 15(article 20), 537–560. doi:10.4054/DemRes.2006.15.20
- McDonald, P., & Moyle, H. (2010). Why do English-speaking countries have relatively high fertility? *Journal of Population Research*, 27, 247–273.
- McLanahan, S. (2004). Diverging destinies: How children are faring under the second demographic transition. *Demography*, 41, 607–627.
- McLanahan, S., & Percheski, C. (2008). Family structure and the reproduction of inequalities. *Annual Review of Sociology*, 34, 257–276.
- Meyer, D. R., Cancian, M., & Cook, S. T. (2005). Multiple-partner fertility: Incidence and implications for child support policy. *Social Service Review*, 79, 577–601.
- Mosher, W. D. (1998). Design and operation of the 1995 National Survey of Family Growth. *Family Planning Perspectives*, 30, 43–46.
- Nock, S. L., Kingston, P. W., & Holian, L. M. (2008). The distribution of obligations. In A. Booth, A. C. Crouter, S. M. Bianchi, & J. A. Seltzer (Eds.), *Intergenerational caregiving* (pp. 279–316). Washington, DC: The Urban Institute Press.
- Nordic Social-Statistical Committee. (2004). *Single parents in the Nordic Countries*. Copenhagen, Denmark: Nordic Social-Statistical Committee.
- OECD. (2008). *Growing unequal? Income distribution and poverty in OECD countries*. Paris, France: OECD Publishing.
- OECD. (2011). Families are changing. In *Doing better for families*. Paris, France: OECD Publishing.
- OECD. (2013). Fertility. In *OECD factbook 2013: Economic, environmental and social statistics*. Paris, France: OECD Publishing.
- Parsons, T. (1955). *Family, socialization, and interaction processes*. New York, NY: Free Press.
- Perelli-Harris, B., Sigle-Rushton, W., Lappegård, T., Keizer, R., Berghammer, C., & Kreyenfeld, M. (2010). The educational gradient of nonmarital childbearing in Europe. *Population and Development Review*, 36, 775–801.
- Popenoe, D. (1988). *Disturbing the nest: Family change and decline in modern societies*. New York, NY: Aldine de Gruyter.
- Raley, R. K., & Bumpass, L. (2003). The topography of the divorce plateau: Levels and trends in union stability in the United States after 1980. *Demographic Research*, 8(article 8), 245–260. doi:10.4054/DemRes.2003.8.8
- Reichman, N. E., Teitler, J. O., Garfinkel, I., & McLanahan, S. (2001). Fragile Families: Sample and design. *Children and Youth Services Review*, 23(4/5), 303–326.
- Roberts, S., Stafford, B., Duffy, D., Ross, J., & Unell, J. (2009). *Literature review on the impact of family breakdown on children: A report to the European Commission*. European Commission, Directorate-General for Employment, Social Affairs, and Equal Opportunities, Unit for Social and Demographic Analysis. Luxembourg: Office for Official Publications of the European Communities.
- Rossi, A. S., & Rossi, P. H. (1990). *Of human bonding: Parent-child relations across the life course*. New York, NY: Aldine de Gruyter.
- Sainsbury, D. (2001). Gender and the making of welfare states: Norway and Sweden. *Social Politics*, 8, 113–143.
- Smeeding, T. M. (2005). Public policy, economic inequality, and poverty: The United States in comparative perspective. *Social Science Quarterly*, 86(Suppl. 1), 955–983.
- Sobotka, T. (2008). The diverse faces of the second demographic transition in Europe. *Demographic Research*, 19(article 8), 171–224. doi:10.4054/DemRes.2008.19.8
- Statistics Norway. (n.d.). *Live births by cohabitation status* (Table 05525). Retrieved from <http://www.ssb.no>
- Sweeney, M. (2010). Remarriage and stepfamilies: Strategic sites for family scholarship in the 21st century. *Journal of Marriage and Family*, 72, 667–684.
- Thomson, E., & Eriksson, H. (Forthcoming). Register-based estimates of parents' coresidence in Sweden, 1969–2007. *Demographic Research*.
- Thomson, E., Hoem, J. M., Vikat, A., Buber, I., Fuernkranz-Prskawetz, A., Toulemon, L., . . . Kantorova, V. (2002). Childbearing in stepfamilies: Whose parity counts? In E. Klijzing & M. Corijn (Eds.), *Dynamics of fertility and partnership in Europe: Insights and lessons from comparative research* (Vol. II, pp. 87–99). Geneva, Switzerland: United Nations.
- Thomson, E., Winkler-Dworak, M., & Kennedy, S. (2013). The standard family life course: An assessment of variability in life course pathways. In A. Evans & J. Baxter (Eds.), *Negotiating the life course: Stability and change in life pathways* (pp. 35–52). Dordrecht, The Netherlands: Springer.
- Thomson, E., Winkler-Dworak, M., Spielauer, M., & Prskawetz, A. (2012). Union stability as an engine of fertility? A micro-simulation model for France. *Demography*, 49, 175–195.

- Thomson, A. (1978). Marital dissolution, remarriage and childbearing. *Demography*, 15, 361–380.
- Turunen, J. (2013). *Adolescent educational outcomes in blended families: Evidence from Swedish register data 1998–2007* (Stockholm Research Reports in Demography 2013:10). Stockholm, Sweden: Stockholm University Demography Unit.
- Van de Kaa, D. J. (1987). Europe's second demographic transition. *Population Bulletin*, 42, 1–59.
- Ventura, S., & Bachrach, C. (2000). *Nonmarital childbearing in the United States, 1949–99* (National Vital Statistics Report 48(6)). Hyattsville, MD: National Center for Health Statistics.
- Vikat, A., Thomson, E., & Hoem, J. M. (1999). Stepfamily fertility in contemporary Sweden: The impact of childbearing before the current union. *Population Studies*, 53, 211–225.
- Watson, N. (Ed.). (2010). *HILDA user manual—Release 8*. Melbourne, Australia: Melbourne Institute of Applied Economic and Social Research, University of Melbourne.
- Wilde, E. T., Batchelder, L., & Ellwood, D. T. (2010). *The mommy track divides: The impact of childbearing on wages of women of differing skill levels* (NBER Working Paper No. 16582). Cambridge, MA: National Bureau of Economic Research.
- Wooden, M., & Watson, N. (2007). The HILDA survey and its contribution to economic and social research (so far). *The Economic Record*, 83, 208–231.
